# Supplementary material for: Multimodal automated diagnosis of lymphovascular invasion in breast cancer on contrast-enhanced MRI: ResUNet++ segmentation and Transformer-based classification
Source: Research Square preprint supplement (doi:10.21203/rs.3.rs-7867527/v1), 2025-11-21

Statistical comparison between the Multimodal Transformer Model and baseline models using DeLong test on combined datasets (Test1 + Test2). Color intensity represents -log₁₀(p-value). All comparisons showed significant differences (** p<0.01,***p<0.001).


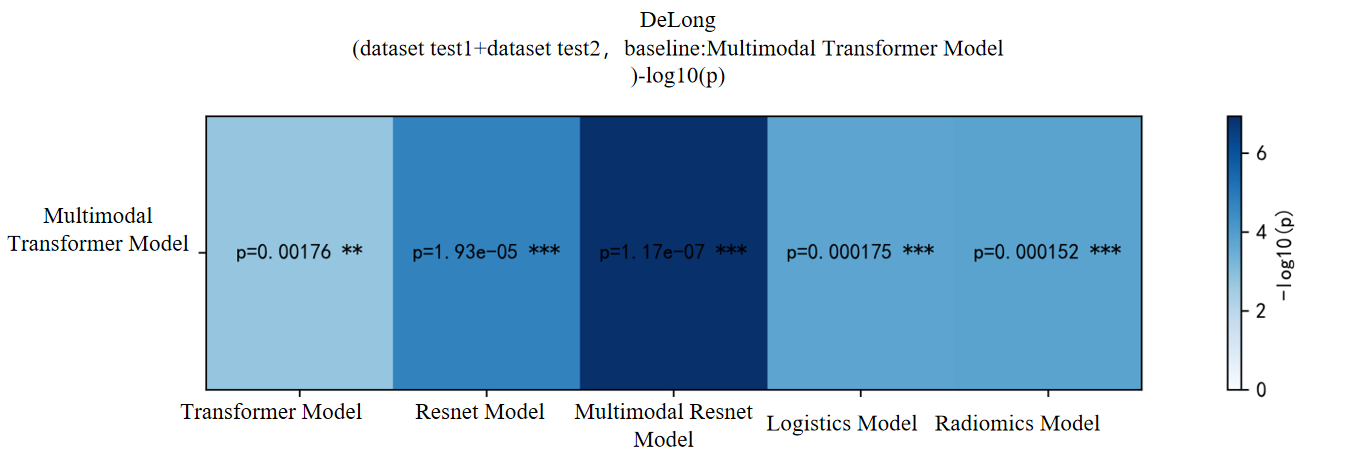


Performance comparison of six models across training set (green), test set (blue), and independent external test set (orange).


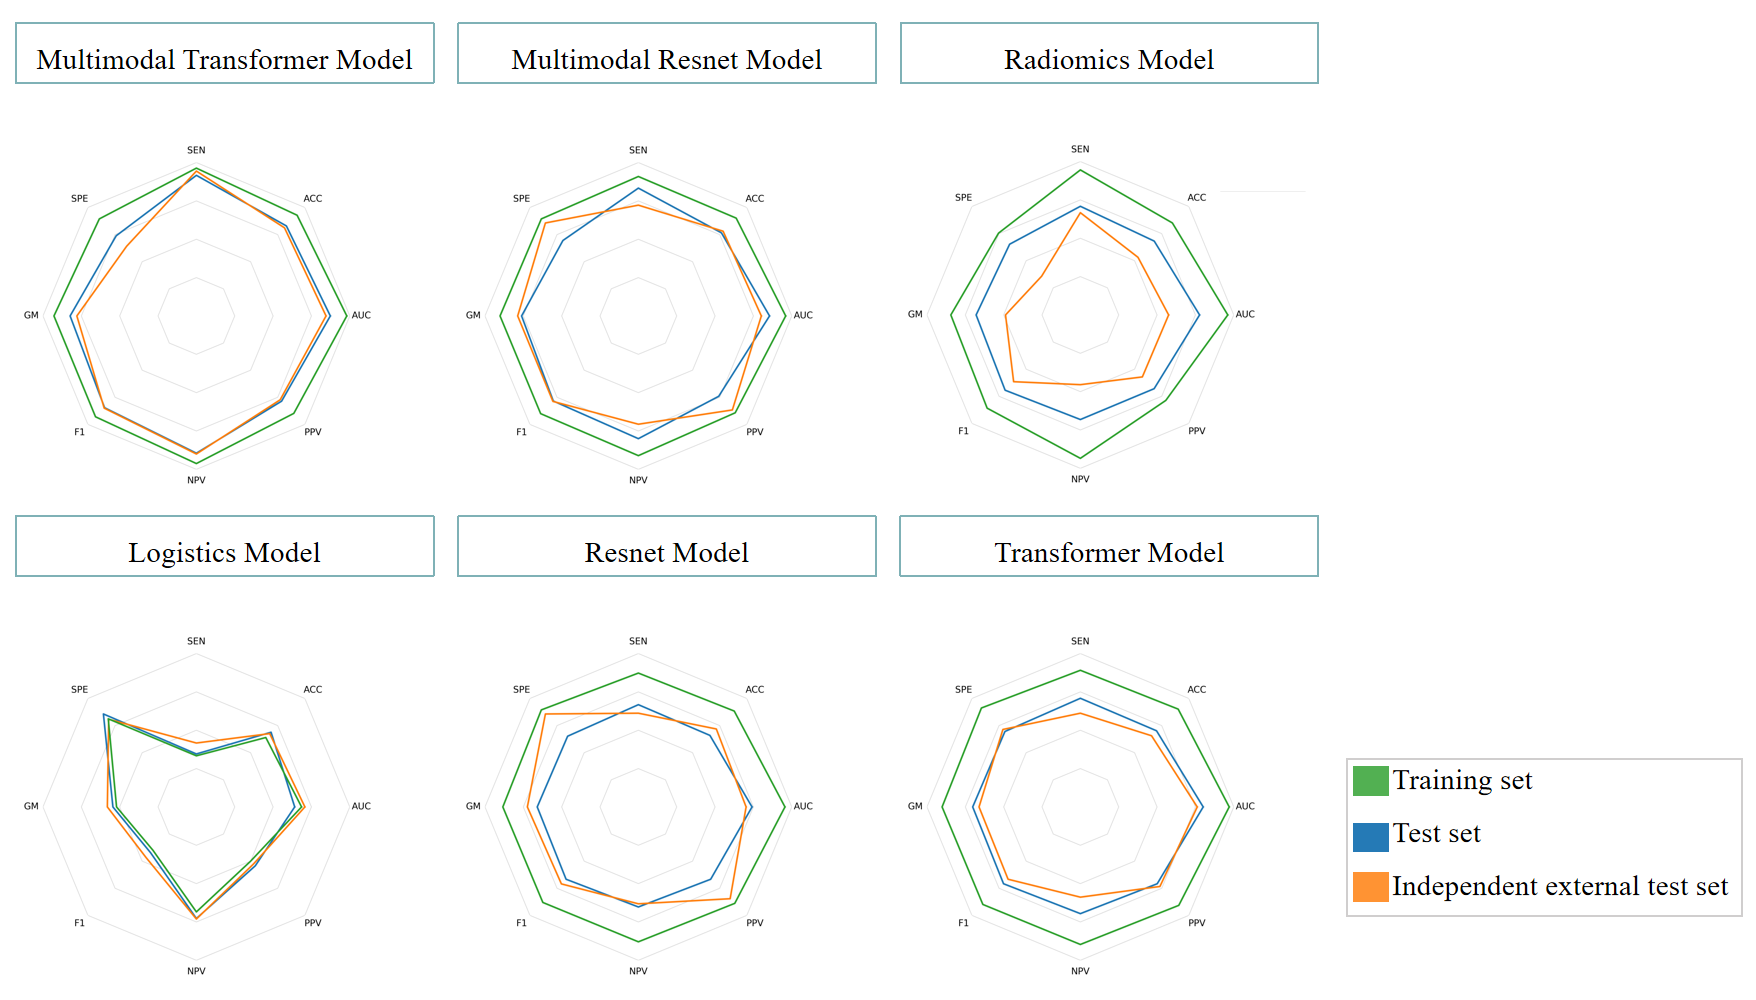

Supplement: Supplementary file 1 [file 3e4e81d95005ebfe8e92e493.docx]
